# Supplementary material for: PD-L1 as a Prognostic Factor in Early-Stage Colon Carcinoma within the Immunohistochemical Molecular Subtype Classification
Source: MDPI journal article supplement (doi:10.3390/cancers13081943), 2021-04-17
Supplement: s1 [file s1]

*Article*

# **Supplementary Materials: PD-L1 as a Prognostic Factor in Early-Stage Colon Carcinoma within the Immunohistochemical Molecular Subtype Classification**

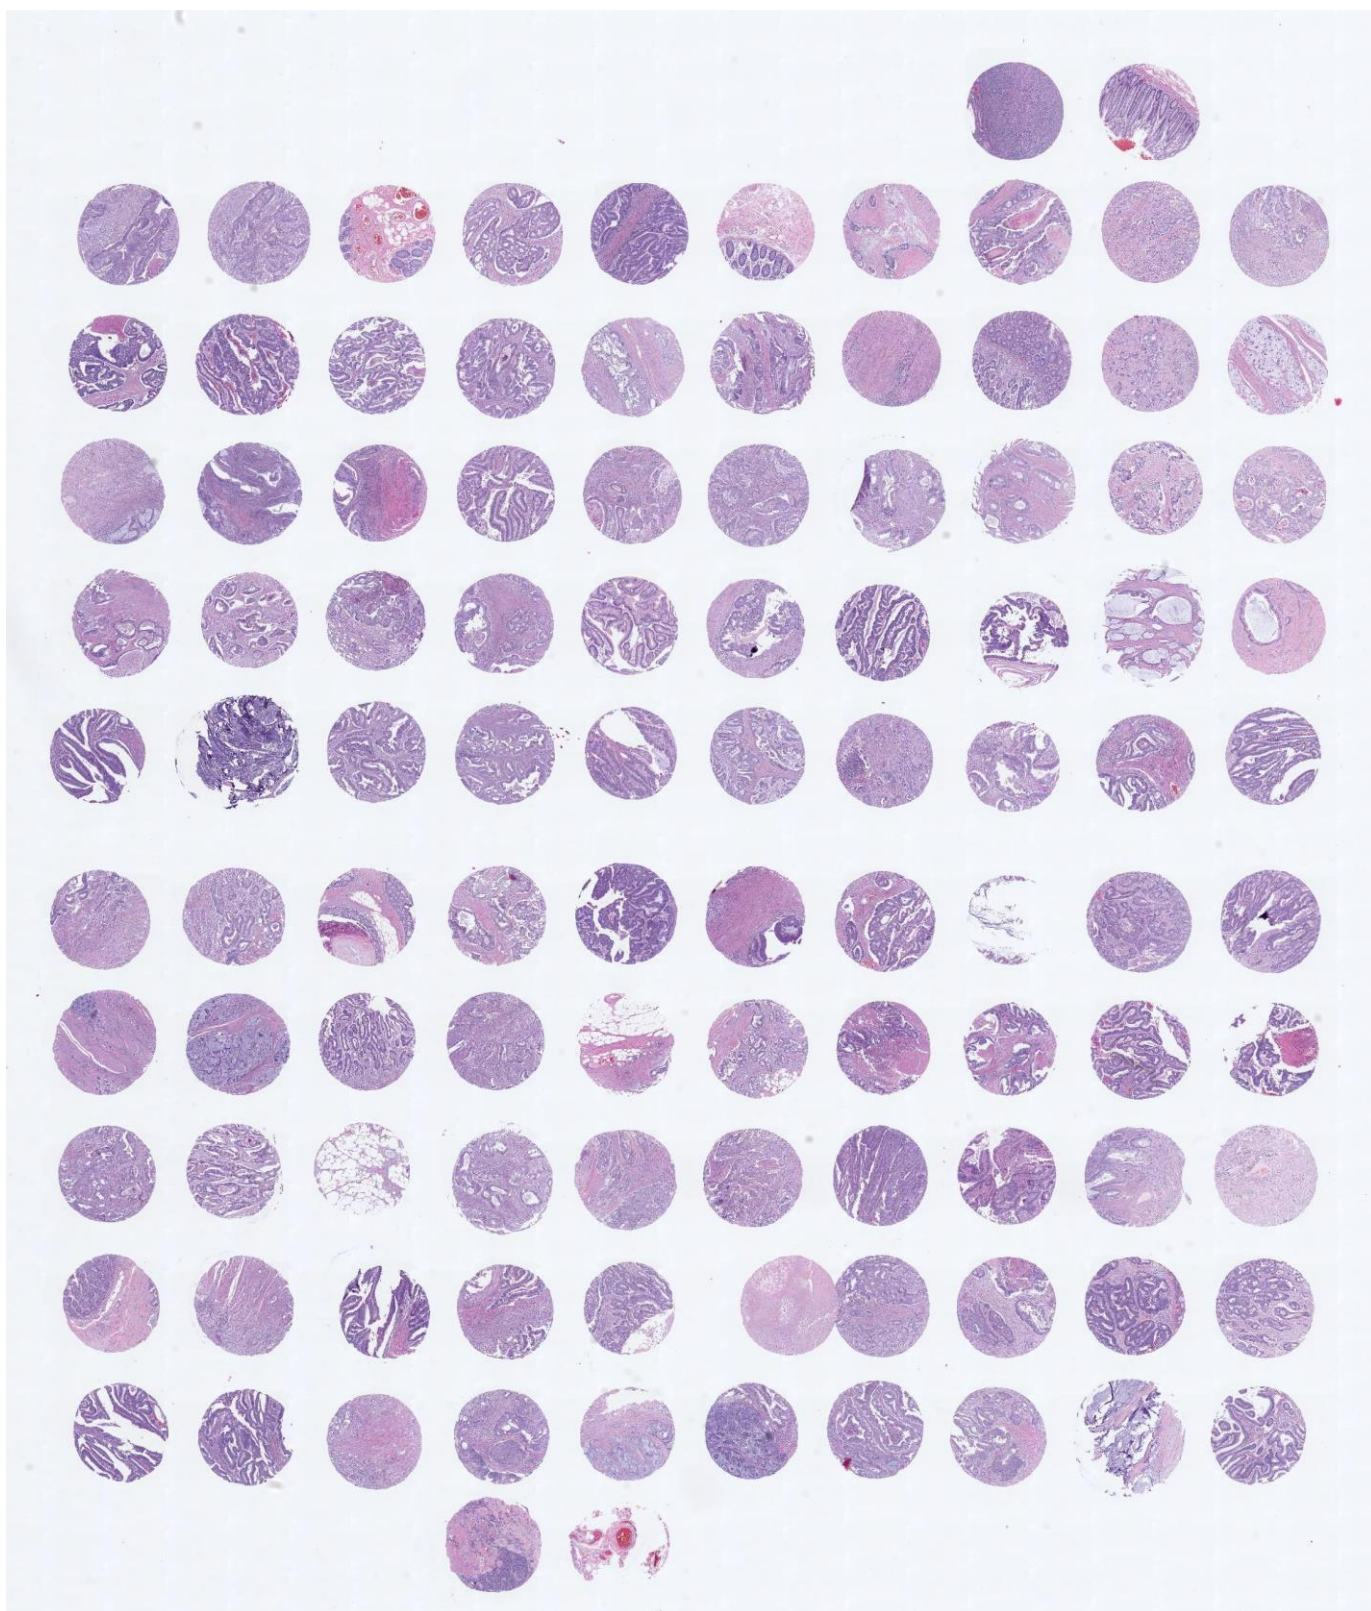

**Figure S1.** Scanned image of TMA (hematoxylin-eosin stain).



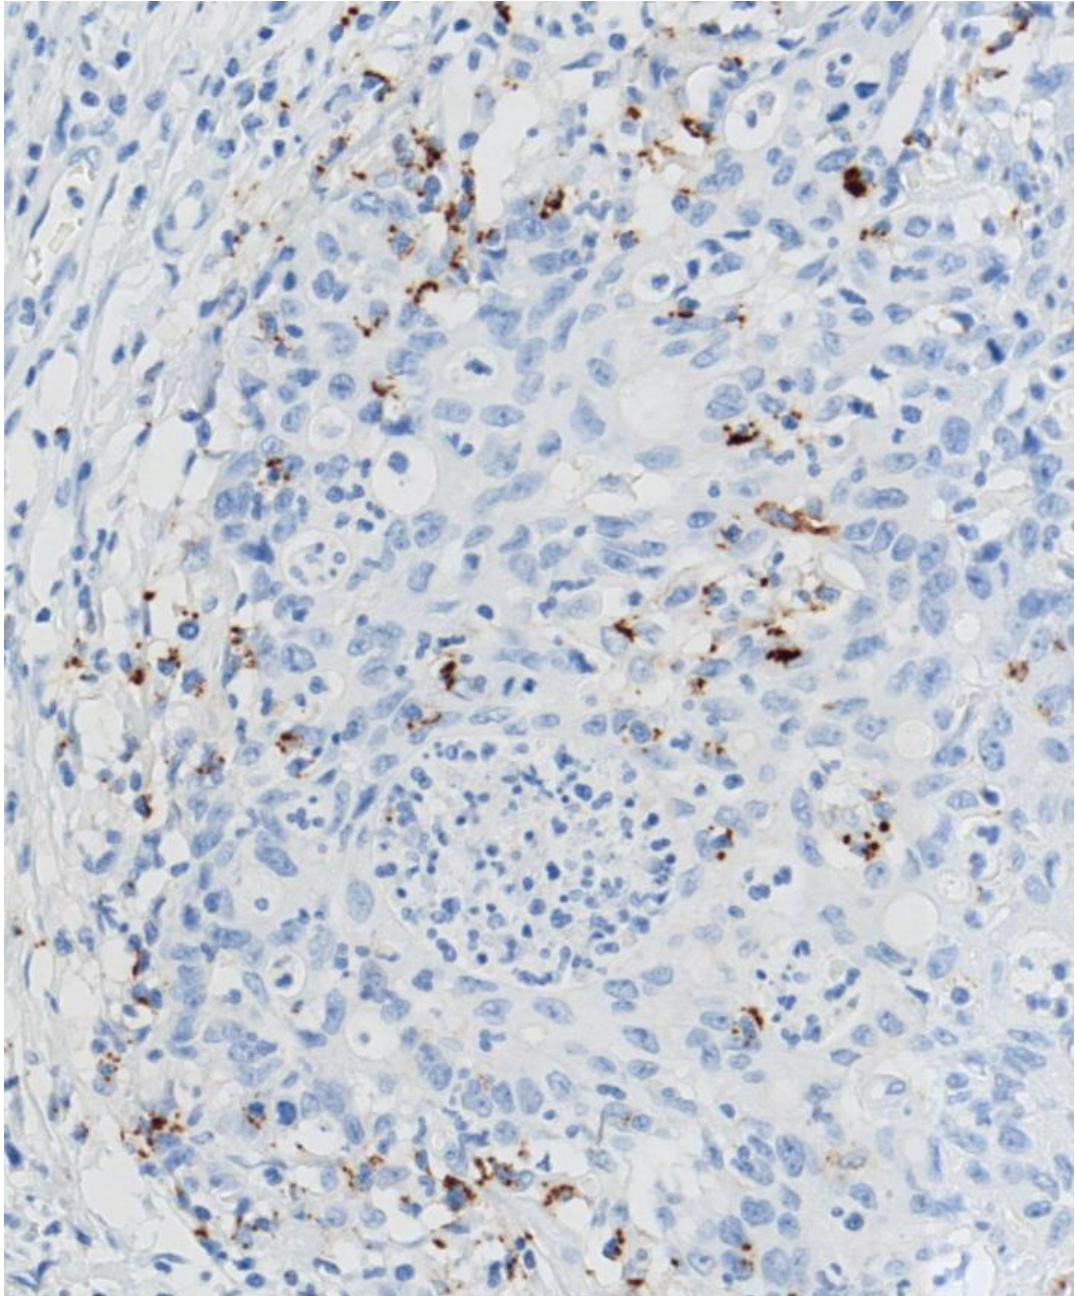

(a)

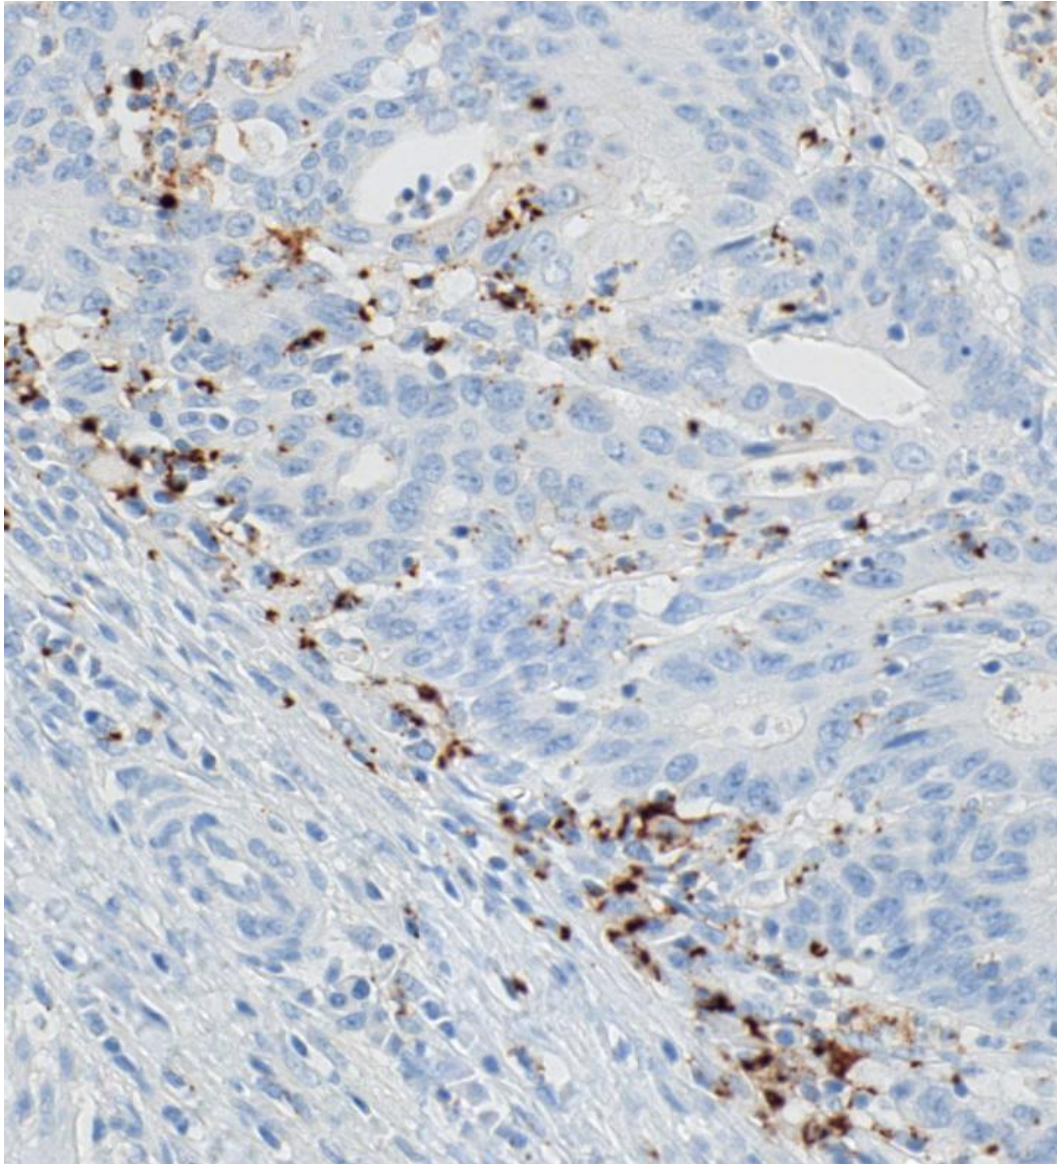

(b)

**Figure S2.** IHC scan detail on high power field of PD-L1 staining in immune cells (core X20).
